# Supplementary material
Source: PubMed Central journal article supplement (PMC2443223)
Supplement: supp_179_2_135_v2_1.pdf [file supp_179_2_135_v2_1.pdf]

Appendix 1: Trials investigating bupropion (page 1 of 2)

| Study                            | Sample size | Design        | Country     | Mean CPD | Smoking abstinence (%) |         |            |         |                  |         |            |         |
|----------------------------------|-------------|---------------|-------------|----------|------------------------|---------|------------|---------|------------------|---------|------------|---------|
|                                  |             |               |             |          | 6 Months               |         |            |         | 12 Months        |         |            |         |
|                                  |             |               |             |          | Point prevalence       |         | Continuous |         | Point prevalence |         | Continuous |         |
|                                  |             |               |             |          | Active                 | Control | Active     | Control | Active           | Control | Active     | Control |
| Tonnesen 2003 <sup>1</sup>       | 707         | R, DB, PC, MC | 8 countries | 23       | 33                     | 18      | 25         | 13      | 28               | 14      | 21         | 11      |
| Jorenby 2006* <sup>2</sup>       | 683         | R, DB, PC, MC | USA         | 22       | 26                     | 25      | NR         | NR      | 23               | 17      | NR         | NR      |
| Gonzales 2006* <sup>3</sup>      | 673         | R, DB, PC, MC | USA         | 21       | 25                     | 15      | NR         | NR      | 23               | 14      | NR         | NR      |
| Ahluwalia 2002† <sup>4</sup>     | 600         | R, DB, PC     | USA         | 17       | 21                     | 14      | 12         | 6       | NR               | NR      | NR         | NR      |
| Fossati 2007 <sup>5</sup>        | 593         | R, DB, PC, MC | Italy       | 23       | 38                     | 24      | NR         | NR      | 35               | 20      | 25         | 14      |
| Collins 2004‡ <sup>6</sup>       | 555         | R, DB, PC, MC | USA         | 21       | 26                     | 16      | NR         | NR      | NR               | NR      | NR         | NR      |
| Aubin 2004 <sup>7</sup>          | 504         | R, DB, PC, MC | France      | NR       | 31                     | 16      | 25         | 13      | NR               | NR      | NR         | NR      |
| Gonzales 2001 <sup>8</sup>       | 450         | R, DB, PC, MC | USA         | NR       | 21                     | 10      | 12         | 2       | NR               | NR      | NR         | NR      |
| Jorenby 1999* <sup>9</sup>       | 404         | R, DB, PC, MC | USA         | 27       | 35                     | 19      | NR         | NR      | 30               | 16      | 18         | 6       |
| Dalsgaro 2004 <sup>10</sup>      | 336         | R, DB, PC, MC | Denmark     | 19       | 23                     | 11      | 18         | 7       | NR               | NR      | NR         | NR      |
| Hurt 1997* <sup>11</sup>         | 309         | R, DB, PC, MC | USA         | 27       | 27                     | 16      | NR         | NR      | 23               | 12      | NR         | NR      |
| Muramoto 2007 i*§ <sup>12</sup>  | 208         | R, DB, PC, MC | USA         | NR       | 9                      | 6       | NR         | NR      | NR               | NR      | NR         | NR      |
| Muramoto 2007 ii*§ <sup>12</sup> | 207         | R, DB, PC, MC | USA         | NR       | 2                      | 6       | NR         | NR      | NR               | NR      | NR         | NR      |
| Hall 2002* <sup>13</sup>         | 146         | R, DB, PC     | USA         | 22       | 25                     | 16      | NR         | NR      | 25               | 14      | 21         | 12      |
| Holt 2005*¶ <sup>14</sup>        | 134         | R, DB, PC     | NZ          | NR       | NR                     | NR      | 30         | 11      | NR               | NR      | 22         | 11      |

Note: CPD = cigarettes per day, R = randomized, DB = double-blind, NZ=New Zealand, PC = placebo controlled, MC = multi-center, NR = not reported.

References appear on the next page.

\*Number of subjects included in the analysis: participants who were not randomized to either 300 mg bupropion SR or placebo, or received more than one smoking cessation pharmacotherapy or medications other than those included in our study were excluded from our analyses.

†This study exclusively recruited African American smokers.

‡Results obtained in part through correspondence.

§Muramoto et al. randomized patients to 150 mg/day of bupropion (i), 300 mg/day of bupropion (ii), or placebo.

¶This study exclusively recruited smokers previously treated with bupropion SR and indigenous Maori of New Zealand.

## References to Appendix 1 (page 2 of 2)

1. Tonnesen P, Tonstad S, Hjalmarson A, et al. A multicentre, randomized, double-blind, placebo-controlled, 1-year study of bupropion SR for smoking cessation. *J Intern Med* 2003;254:184-92.
2. Jorenby DE, Hays JT, Rigotti NA, et al. Efficacy of varenicline, an alpha4beta2 nicotinic acetylcholine receptor partial agonist, vs placebo or sustained-release bupropion for smoking cessation: a randomized controlled trial. *JAMA* 2006;296:56-63.
3. Gonzales D, Rennard SI, Nides M, et al. Varenicline, an alpha4beta2 nicotinic acetylcholine receptor partial agonist, vs sustained-release bupropion and placebo for smoking cessation: a randomized controlled trial. *JAMA* 2006;296:47-55.
4. Ahluwalia JS, Harris KJ, Catley D, et al. Sustained-release bupropion for smoking cessation in African Americans: a randomized controlled trial. *JAMA* 2002;288:468-74.
5. Fossati R, Apolone G, Negri E, et al. A double-blind, placebo-controlled, randomized trial of bupropion for smoking cessation in primary care. *Arch Intern Med* 2007;167:1791-7.
6. Collins BN, Wileyto EP, Patterson F, et al. Gender differences in smoking cessation in a placebo-controlled trial of bupropion with behavioral counseling. *Nicotine Tob Res* 2004;6:27-37.
7. Aubin HJ, Lebagry F, Berlin I, et al. Efficacy of bupropion and predictors of successful outcome in a sample of French smokers: a randomized placebo-controlled trial. *Addiction* 2004;99:1206-18.
8. Gonzales DH, Nides MA, Ferry LH, et al. Bupropion SR as an aid to smoking cessation in smokers treated previously with bupropion: a randomized placebo-controlled study. *Clin Pharmacol Ther* 2001;69:438-44.
9. Jorenby DE, Leischow SJ, Nides MA, et al. A controlled trial of sustained-release bupropion, a nicotine patch, or both for smoking cessation. *N Engl J Med* 1999;340:685-91.
10. Dalsgareth OJ, Hansen NC, Soes-Petersen U, et al. A multicenter, randomized, double-blind, placebo-controlled, 6-month trial of bupropion hydrochloride sustained-release tablets as an aid to smoking cessation in hospital employees. *Nicotine Tob Res* 2004;6:55-61.
11. Hurt RD, Sachs DP, Glover ED, et al. A comparison of sustained-release bupropion and placebo for smoking cessation. *N Engl J Med* 1997;337:1195-202.
12. Muramoto ML, Leischow SJ, Sherrill D, et al. Randomized, double-blind, placebo-controlled trial of 2 dosages of sustained-release bupropion for adolescent smoking cessation. *Arch Pediatr Adolesc Med* 2007;161:1068-74.
13. Hall SM, Humfleet GL, Reus VI, et al. Psychological intervention and antidepressant treatment in smoking cessation. *Arch Gen Psychiatry* 2002;59:930-6.
14. Holt S, Timu-Parata C, Ryder-Lewis S, et al. Efficacy of bupropion in the indigenous Maori population in New Zealand. *Thorax* 2005;60:120-3.
