# Supplementary material
Source: PubMed Central journal article supplement (PMC2443223)
Supplement: supp_179_2_135_v2_2.pdf [file supp_179_2_135_v2_2.pdf]

Appendix 2: Trials investigating nicotine gum (page 1 of 2)

| Study                         | Sample size | Design        | Country            | Mean CPD | Smoking abstinence (%) |         |            |         |                  |         |            |         |
|-------------------------------|-------------|---------------|--------------------|----------|------------------------|---------|------------|---------|------------------|---------|------------|---------|
|                               |             |               |                    |          | 6 Months               |         |            |         | 12 Months        |         |            |         |
|                               |             |               |                    |          | Point prevalence       |         | Continuous |         | Point prevalence |         | Continuous |         |
|                               |             |               |                    |          | Active                 | Control | Active     | Control | Active           | Control | Active     | Control |
| Campbell 1987 <sup>1</sup>    | 836         | R, DB, PC, MC | England            | 22       | NR                     | NR      | NR         | NR      | 5                | 3       | NR         | NR      |
| Killen 1990* <sup>2</sup>     | 610         | R, DB, PC, MC | USA                | 25       | NR                     | NR      | NR         | NR      | 19               | 18      | NR         | NR      |
| Hughes 1989 <sup>3</sup>      | 315         | R, DB, PC, MC | USA                | 30       | 29                     | 19      | NR         | NR      | 12               | 9       | 11         | 6       |
| Garvey 2000 ii*† <sup>4</sup> | 406         | R, DB, PC     | USA                | 24       | 22                     | 11      | NR         | NR      | 20               | 8       | 13         | 9       |
| Garvey 2000 i*† <sup>4</sup>  | 405         | R, DB, PC     | USA                | 23       | 27                     | 11      | NR         | NR      | 17               | 8       | 13         | 9       |
| Fee 1982 <sup>5</sup>         | 352         | R, DB, PC     | England            | NR       | 13                     | 14      | NR         | NR      | 13               | 9       | NR         | NR      |
| Fortmann 1988*‡ <sup>6</sup>  | 300         | R, DB, PC     | USA                | 25       | 22                     | 30      | NR         | NR      | NR               | NR      | NR         | NR      |
| Cooper 2005 <sup>7</sup>      | 294         | R, DB, PC     | USA                | 23       | 12                     | 11      | NR         | NR      | 12               | 10      | NR         | NR      |
| Hjalmarson 1984 <sup>8</sup>  | 206         | R, DB, PC     | Sweden             | 24       | NR                     | NR      | 35         | 20      | NR               | NR      | 27         | 16      |
| Jamrozik 1984 <sup>9</sup>    | 200         | R, DB, PC, MC | England            | NR       | 10                     | 8       | NR         | NR      | NR               | NR      | NR         | NR      |
| Areechon 1988 <sup>10</sup>   | 199         | R, DB, PC     | Thailand           | 24       | 57                     | 37      | NR         | NR      | NR               | NR      | NR         | NR      |
| Hall 1996 <sup>11</sup>       | 201         | R, DB, PC     | USA                | 24       | 31                     | 30      | NR         | NR      | 24               | 27      | 21         | 24      |
| Blondal 1989 <sup>12</sup>    | 182         | R, DB, PC     | Iceland            | NR       | NR                     | NR      | NR         | NR      | 40               | 27      | 33         | 24      |
| Herrera 1995* <sup>13</sup>   | 154         | R, DB, PC, MC | Sweden & Venezuela | 16       | NR                     | NR      | 53         | 26      | NR               | NR      | 44         | 19      |
| Malcolm 1980 <sup>14</sup>    | 136         | R, DB, PC     | England            | 26       | NR                     | NR      | 23         | 5       | NR               | NR      | NR         | NR      |
| Tonnesen 1988* <sup>15</sup>  | 113         | R, DB, PC     | Denmark            | 20       | NR                     | NR      | NR         | NR      | NR               | NR      | 38         | 27      |
| Jarvis 1982 <sup>16</sup>     | 116         | R, DB, PC     | USA                | 29       | NR                     | NR      | NR         | NR      | 47               | 21      | 31         | 14      |
| Schneider 1983§ <sup>17</sup> | 96          | R, DB, PC     | USA                | NR       | NR                     | NR      | 37         | 19      | NR               | NR      | 23         | 17      |
| Hall 1987 ii*¶ <sup>18</sup>  | 70          | R, DB, PC     | USA                | 30       | 56                     | 35      | NR         | NR      | 50               | 21      | NR         | NR      |
| Hall 1987 i*¶ <sup>18</sup>   | 69          | R, DB, PC     | USA                | 30       | 43                     | 21      | NR         | NR      | 35               | 21      | NR         | NR      |
| Jarvik 1984 <sup>19</sup>     | 48          | R, DB, PC, MC | USA                | NR       | NR                     | NR      | NR         | NR      | 28               | 17      | NR         | NR      |

CPD = cigarettes per day, R = randomized, DB = double-blind, PC = placebo controlled, MC = multi-center, NR = not reported. References appear on the next page.

\*Number of subjects included in the analysis: participants who were from centres that did not biochemically validate abstinence claims, not randomized to either an add lib nicotine gum or placebo, received more than one pharmacotherapy or medications other than those included in our study, or participated in an open label arm of the study were excluded from our analyses.

†The RCT by Garvey et al. had 3 treatment arms: 2 mg nicotine gum (ii), 4 mg nicotine gum (i), and placebo.

‡Preliminary report of Killen 1990.

§The 1995 RCT by Schneider et al. did not report dosage and was thus excluded from our analyses and forest plot.

¶The RCT by Hall et al. used a factorial design, randomizing patients to high- or low-intensity behavioural therapy and nicotine gum or placebo. We compare nicotine gum with low-intensity therapy versus placebo with low-intensity behavioural therapy (ii) and nicotine gum with intensive therapy versus placebo with intensive therapy (i).

## References to Appendix 2 (page 2 of 2)

1. Campbell IA, Lyons E, Prescott RJ. Stopping smoking. Do nicotine chewing-gum and postal encouragement add to doctors' advice. *Practitioner* 1987;231:114-7.
2. Killen JD, Fortmann SP, Newman B, et al. Evaluation of a treatment approach combining nicotine gum with self-guided behavioral treatments for smoking relapse prevention. *J Consult Clin Psychol* 1990;58:85-92.
3. Hughes JR, Gust SW, Keenan RM, et al. Nicotine vs placebo gum in general medical practice. *JAMA* 1989;261:1300-5.
4. Garvey AJ, Kinnunen T, Nordstrom BL, et al. Effects of nicotine gum dose by level of nicotine dependence. *Nicotine Tob Res* 2000;2:53-63.
5. Fee WM, Stewart MJ. A controlled trial of nicotine chewing gum in a smoking withdrawal clinic. *Practitioner* 1982;226:148-51.
6. Fortmann SP, Killen JD, Telch MJ, et al. Minimal contact treatment for smoking cessation. A placebo controlled trial of nicotine polacrilex and self-directed relapse prevention: initial results of the Stanford Stop Smoking Project. *JAMA* 1988;260:1575-80.
7. Cooper TV, Klesges RC, Debon MW, et al. A placebo controlled randomized trial of the effects of phenylpropranolamine and nicotine gum on cessation rates and postcessation weight gain in women. *Addict Behav* 2005;30:61-75.
8. Hjalmarson AI. Effect of nicotine chewing gum in smoking cessation. A randomized, placebo-controlled, double-blind study. *JAMA* 1984;252:2835-8.
9. Jamrozik K, Fowler G, Vessey M, et al. Placebo controlled trial of nicotine chewing gum in general practice. *Br Med J (Clin Res Ed)* 1984;289:794-7.
10. Areechon W, Punnotok J. Smoking cessation through the use of nicotine chewing gum: a double-blind trial in Thailand. *Clin Ther* 1988;10:183-6.
11. Hall SM, Munoz RF, Reus VI, et al. Mood management and nicotine gum in smoking treatment: a therapeutic contact and placebo-controlled study. *J Consult Clin Psychol* 1996;64:1003-9.
12. Blondal T. Controlled trial of nicotine polacrilex gum with supportive measures. *Arch Intern Med* 1989;149:1818-21.
13. Herrera N, Franco R, Herrera L, et al. Nicotine gum, 2 and 4 mg, for nicotine dependence. A double-blind placebo-controlled trial within a behavior modification support program. *Chest* 1995;108:447-51.
14. Malcolm RE, Sillett RW, Turner JA, et al. The use of nicotine chewing gum as an aid to stopping smoking. *Psychopharmacology (Berl)* 1980;70:295-6.
15. Tonnesen P, Fryd V, Hansen M, et al. Effect of nicotine chewing gum in combination with group counseling on the cessation of smoking. *N Engl J Med* 1988;318:15-8.
16. Jarvis MJ, Raw M, Russell MA, et al. Randomised controlled trial of nicotine chewing-gum. *Br Med J (Clin Res Ed)* 1982;285:537-40.
17. Schneider NG, Jarvik ME, Forsythe AB, et al. Nicotine gum in smoking cessation: a placebo-controlled, double-blind trial. *Addict Behav* 1983;8:253-61.
18. Hall SM, Tunstall CD, Ginsberg D, et al. Nicotine gum and behavioral treatment: a placebo controlled trial. *J Consult Clin Psychol* 1987;55:603-5.
19. Jarvik ME, Schneider NG. Degree of addiction and effectiveness of nicotine gum therapy for smoking. *Am J Psychiatry* 1984;141:790-1.
