# Supplementary material
Source: PubMed Central journal article supplement (PMC2443223)
Supplement: supp_179_2_135_v2_3.pdf [file supp_179_2_135_v2_3.pdf]

Appendix 3: Trials investigating transdermal nicotine (page 1 of 3)

| Study                             | Sample size | Design        | Country         | Mean CPD | Smoking abstinence (%) |         |            |         |                  |         |            |         |
|-----------------------------------|-------------|---------------|-----------------|----------|------------------------|---------|------------|---------|------------------|---------|------------|---------|
|                                   |             |               |                 |          | 6 Months               |         |            |         | 12 Months        |         |            |         |
|                                   |             |               |                 |          | Point prevalence       |         | Continuous |         | Point prevalence |         | Continuous |         |
|                                   |             |               |                 |          | Active                 | Control | Active     | Control | Active           | Control | Active     | Control |
| ICRF GPRG 1994 <sup>1,2</sup>     | 1,686       | R, DB, PC, MC | England         | 24       | NR                     | NR      | NR         | NR      | NR               | NR      | 9          | 6       |
| Tonnesen 1999 iv*† <sup>3</sup>   | 1,430       | R, DB, PC, MC | 17 countries    | 27       | NR                     | NR      | 15         | 12      | NR               | 13      | 12         | 10      |
| Tonnesen 1999 i*† <sup>3</sup>    | 1,429       | R, DB, PC, MC | 17 countries    | 28       | NR                     | NR      | 20         | 12      | NR               | 13      | 15         | 10      |
| Tonnesen 1999 ii*† <sup>3</sup>   | 1,429       | R, DB, PC, MC | 17 countries    | 27       | NR                     | NR      | 21         | 12      | NR               | 13      | 16         | 10      |
| Tonnesen 1999 iii*† <sup>3</sup>  | 1,429       | R, DB, PC, MC | 17 countries    | 27       | NR                     | NR      | 18         | 12      | NR               | 13      | 14         | 10      |
| Stapleton 1995‡ <sup>4</sup>      | 1,200       | R, DB, PC, MC | England         | 24       | NR                     | NR      | 13         | 6       | NR               | NR      | 10         | 5       |
| Hays* 1999 <sup>5</sup>           | 643         | R, DB, PC, MC | USA             | NR       | 8                      | 4       | 6          | 3       | NR               | NR      | NR         | NR      |
| Gourlay 1995‡§ <sup>6</sup>       | 629         | R, DB, PC     | Australia       | 27       | 6                      | 3       | 2          | 1       | NR               | NR      | NR         | NR      |
| TNSG 1991 i¶ <sup>7</sup>         | 507         | R, DB, PC, MC | USA             | 31       | NR                     | NR      | 18         | 12      | NR               | NR      | NR         | NR      |
| TNSG 1991 ii¶ <sup>7</sup>        | 502         | R, DB, PC, MC | USA             | 31       | NR                     | NR      | 26         | 12      | NR               | NR      | NR         | NR      |
| Jorenby 1999* <sup>8</sup>        | 404         | R, DB, PC, MC | USA             | 27       | 21                     | 19      | NR         | NR      | 16               | 16      | 10         | 6       |
| Daughton 1998 <sup>9</sup>        | 369         | R, DB, PC, MC | USA             | 28       | NR                     | NR      | 18         | 10      | NR               | NR      | 15         | 9       |
| Hughes 1999 i*,** <sup>10</sup>   | 440         | R, DB, PC, MC | Australia & USA | 38       | 17                     | 11      | 11         | 5       | 13               | 8       | 8          | 4       |
| Hughes 1999 ii*,** <sup>10</sup>  | 440         | R, DB, PC, MC | Australia & USA | 38       | 16                     | 11      | 6          | 5       | 10               | 8       | 3          | 4       |
| Richmond 1994 <sup>11</sup>       | 305         | R, DB, PC     | Australia       | 29       | 32                     | 14      | 25         | 12      | 27               | 12      | 19         | 9       |
| Kornitzer 1995* <sup>12</sup>     | 225         | R, DB, PC, MC | Sweden          | 26       | NR                     | NR      | 34         | 12      | NR               | NR      | 25         | 9       |
| Tonnesen 1991 <sup>13</sup>       | 289         | R, DB, PC     | Denmark         | 21       | 24                     | 5       | NR         | NR      | 17               | 4       | 11         | 2       |
| Hurt 1994 <sup>14</sup>           | 240         | R, DB, PC, MC | USA             | 30       | 29                     | 16      | NR         | NR      | 28               | 14      | NR         | NR      |
| Hughes 1999 iii*,** <sup>10</sup> | 439         | R, DB, PC, MC | Australia & USA | 38       | 23                     | 11      | 11         | 5       | 18               | 8       | 13         | 4       |
| Sachs 1993 <sup>15</sup>          | 220         | R, DB, PC     | England         | 28       | NR                     | NR      | 15         | 15      | NR               | NR      | 13         | 13      |
| Killen 1997 ii*†† <sup>16</sup>   | 217         | R, DB, PC     | USA             | 24       | 16                     | 12      | NR         | NR      | 14               | 10      | NR         | NR      |
| Killen 1997 i*†† <sup>16</sup>    | 207         | R, DB, PC     | USA             | 23       | 25                     | 19      | NR         | NR      | 21               | 14      | NR         | NR      |
| Abelin 1989‡ <sup>17,18</sup>     | 199         | R, DB, PC, MC | Switzerland     | 28       | 22                     | 12      | NR         | NR      | NR               | NR      | NR         | NR      |

**Appendix 3: Trials investigating transdermal nicotine (page 2 of 3)**

| Study                                         | Sample size | Design        | Country | Mean CPD | Smoking abstinence (%) |         |            |         |                  |         |            |         |
|-----------------------------------------------|-------------|---------------|---------|----------|------------------------|---------|------------|---------|------------------|---------|------------|---------|
|                                               |             |               |         |          | 6 Months               |         |            |         | 12 Months        |         |            |         |
|                                               |             |               |         |          | Point prevalence       |         | Continuous |         | Point prevalence |         | Continuous |         |
|                                               |             |               |         |          | Active                 | Control | Active     | Control | Active           | Control | Active     | Control |
| Westman 1993 <sup>19</sup>                    | 159         | R, DB, PC     | USA     | 30       | NR                     | NR      | 20         | 3       | NR               | NR      | NR         | NR      |
| Paoletti 1996 <sup>20</sup>                   | 120         | R, DB, PC     | Italy   | 24       | NR                     | NR      | NR         | NR      | NR               | NR      | 28         | 8       |
| Glavas 2003 <sup>21</sup>                     | 112         | R, DB, PC     | Croatia | 23       | NR                     | NR      | NR         | NR      | 23               | 16      | NR         | NR      |
| Fiore 1994 ii* <sup>‡‡</sup> <sup>22</sup>    | 112         | R, DB, PC, MC | USA     | 30       | 18                     | 7       | NR         | NR      | NR               | NR      | NR         | NR      |
| Fiore 1994 i* <sup>‡‡</sup> <sup>22</sup>     | 87          | R, DB, PC, MC | USA     | 29       | 35                     | 21      | NR         | NR      | NR               | NR      | NR         | NR      |
| Daughton 1991 i* <sup>§§</sup> <sup>23</sup>  | 52          | R, DB, PC     | USA     | 33       | NR                     | NR      | 30         | 12      | NR               | NR      | NR         | NR      |
| Daughton 1991 ii* <sup>§§</sup> <sup>23</sup> | 50          | R, DB, PC     | USA     | 33       | NR                     | NR      | 24         | 12      | NR               | NR      | NR         | NR      |

CPD = cigarettes per day, R = randomized, DB = double-blind, PC = placebo controlled, MC = multi-center, NR = not reported, ICRF GPRG = Imperial Cancer Research Fund General Practice Research Group, TNSG = Transdermal Nicotine Study Group.

References appear on the next page.

\*Number of subjects included in the analysis: participants who were from centres that did not biochemically validate abstinence claims, not randomized to either transdermal nicotine or placebo, received more than one pharmacotherapy or medications other than those included in our study, or participated in an open label arm of the study were excluded from our analyses.

†Patients randomized to 25 mg/day for 26 weeks (i), 25 mg/day for 12 weeks (ii), 15 mg/day for 26 weeks (iii), 15 mg/day for 12 weeks, or placebo.

‡The RCTs conducted by Stapleton (treatment length), Gourlay (dosage), and Abelin (dosage) did not report covariates that were included in our hierarchical model and thus were excluded from our analyses and forest plot.

§Study exclusively recruited smokers previously treated with transdermal nicotine and brief behavioural counselling.

¶Outcomes reported for only one member of each of the eight couples participating in the trial. Patients were randomized to 14 mg/day (i), 21 mg/day (ii), or placebo.

\*\*Patients were randomized to 21 mg/day for 10 weeks (i), 35 mg/day for 14 weeks (ii), 42 mg/day for 16 weeks (iii), or placebo. Results obtained in part through correspondence.

‡‡The RCT by Killen et al used a factorial design. We compared patients randomized to transdermal nicotine, self-help manual, and self-help video to those randomized to placebo, self-help manual, and self-help video (i) and patients randomized to transdermal nicotine and self-help manual to those randomized to placebo and self-help manual (ii).

§§Fiore conducted two RCTs that were published together. Patients were randomized to 8 weeks of abrupt transdermal nicotine (i), 6 weeks of tapered transdermal nicotine (ii) or corresponding placebos.

¶¶The RCT by Daughton et al. randomized patients to transdermal nicotine patch for 16 hours/day (i), transdermal nicotine patch for 24 hours/day (ii), or placebo.

### References to Appendix 3 (page 3 of 3)

1. Randomised trial of nicotine patches in general practice: results at one year. Imperial Cancer Research Fund General Practice Research Group. *BMJ* 1994;308:1476-7.
2. Effectiveness of a nicotine patch in helping people stop smoking: results of a randomised trial in general practice. Imperial Cancer Research Fund General Practice Research Group. *BMJ* 1993;306:1304-8.
3. Tonnesen P, Paoletti P, Gustavsson G, et al. Higher dosage nicotine patches increase one-year smoking cessation rates: results from the European CEASE trial. Collaborative European Anti-Smoking Evaluation. European Respiratory Society. *Eur Respir J* 1999;13:238-46.
4. Stapleton JA, Russell MA, Feyerabend C, et al. Dose effects and predictors of outcome in a randomized trial of transdermal nicotine patches in general practice. *Addiction* 1995;90:31-42.
5. Hays JT, Croghan IT, Schroeder DR, et al. Over-the-counter nicotine patch therapy for smoking cessation: results from randomized, double-blind, placebo-controlled, and open label trials. *Am J Public Health* 1999;89:1701-7.
6. Gourlay SG, Forbes A, Marriner T, et al. Double blind trial of repeated treatment with transdermal nicotine for relapsed smokers. *BMJ* 1995;311:363-6.
7. Transdermal nicotine for smoking cessation. Six-month results from two multicenter controlled clinical trials. Transdermal Nicotine Study Group. *JAMA* 1991;266:3133-8.
8. Jorenby DE, Leischow SJ, Nides MA, et al. A controlled trial of sustained-release bupropion, a nicotine patch, or both for smoking cessation. *N Engl J Med* 1999;340:685-91.
9. Daughton D, Susman J, Sitorius M, et al. Transdermal nicotine therapy and primary care. Importance of counseling, demographic, and participant selection factors on 1-year quit rates. The Nebraska Primary Practice Smoking Cessation Trial Group. *Arch Fam Med* 1998;7:425-30.
10. Hughes JR, Lesmes GR, Hatsukami DK, et al. Are higher doses of nicotine replacement more effective for smoking cessation? *Nicotine Tob Res* 1999;1:169-74.
11. Richmond RL, Harris K, de Almeida NA. The transdermal nicotine patch: results of a randomised placebo-controlled trial. *Med J Aust* 1994;161:130-5.
12. Kornitzer M, Boutsen M, Dramaix M, et al. Combined use of nicotine patch and gum in smoking cessation: a placebo-controlled clinical trial. *Prev Med* 1995;24:41-7.
13. Tonnesen P, Norregaard J, Simonsen K, et al. A double-blind trial of a 16-hour transdermal nicotine patch in smoking cessation. *N Engl J Med* 1991;325:311-5.
14. Hurt RD, Dale LC, Fredrickson PA, et al. Nicotine patch therapy for smoking cessation combined with physician advice and nurse follow-up. One-year outcome and percentage of nicotine replacement. *JAMA* 1994;271:595-600.
15. Sachs DP, Sawe U, Leischow SJ. Effectiveness of a 16-hour transdermal nicotine patch in a medical practice setting, without intensive group counseling. *Arch Intern Med* 1993;153:1881-90.
16. Killen JD, Fortmann SP, Davis L, et al. Nicotine patch and self-help video for cigarette smoking cessation. *J Consult Clin Psychol* 1997;65:663-72.
17. Abelin T, Buehler A, Muller P, et al. Controlled trial of transdermal nicotine patch in tobacco withdrawal. *Lancet* 1989;1:7-10.
18. Abelin T, Ehrensam R, Buhler-Reichert A, et al. Effectiveness of a transdermal nicotine system in smoking cessation studies. *Methods Find Exp Clin Pharmacol* 1989;11:205-14.
19. Westman EC, Levin ED, Rose JE. The nicotine patch in smoking cessation. A randomized trial with telephone counseling. *Arch Intern Med* 1993;153:1917-23.
20. Paoletti P, Fornai E, Maggiorelli F, et al. Importance of baseline cotinine plasma values in smoking cessation: results from a double-blind study with nicotine patch. *Eur Respir J* 1996;9:643-51.
21. Glavas D, Rumboldt M, Rumboldt Z. Smoking cessation with nicotine replacement therapy among health care workers: randomized double-blind study. *Croat Med J* 2003;44:219-24.
22. Fiore MC, Kenford SL, Jorenby DE, et al. Two studies of the clinical effectiveness of the nicotine patch with different counseling treatments. *Chest* 1994;105:524-33.
23. Daughton DM, Heatley SA, Prendergast JJ, et al. Effect of transdermal nicotine delivery as an adjunct to low-intervention smoking cessation therapy. A randomized, placebo-controlled, double-blind study. *Arch Intern Med* 1991;151:749-52.
