# Supplementary material
Source: PubMed Central journal article supplement (PMC2443223)
Supplement: supp_179_2_135_v2_4.pdf [file supp_179_2_135_v2_4.pdf]

Appendix 4: Trials investigating varenicline (page 1 of 2)

| Study                             | Sample size* | Design        | Country        | Mean CPD | Smoking abstinence (%) |         |            |         |                  |         |            |         |
|-----------------------------------|--------------|---------------|----------------|----------|------------------------|---------|------------|---------|------------------|---------|------------|---------|
|                                   |              |               |                |          | 6 Months               |         |            |         | 12 Months        |         |            |         |
|                                   |              |               |                |          | Point prevalence       |         | Continuous |         | Point prevalence |         | Continuous |         |
|                                   |              |               |                |          | Active                 | Control | Active     | Control | Active           | Control | Active     | Control |
| Gonzales 2006 <sup>1</sup>        | 696          | R, DB, PC, MC | USA            | 21       | 34                     | 18      | NR         | NR      | 29               | 14      | NR         | NR      |
| Jorenby 2006 <sup>2</sup>         | 685          | R, DB, PC, MC | USA            | 22       | 35                     | 15      | NR         | NR      | 31               | 17      | NR         | NR      |
| Nakamura 2007 iii*†‡ <sup>3</sup> | 310          | R, DB, PC, MC | Japan          | 24       | 47                     | 34      | 41         | 29      | 42               | 27      | 36         | 23      |
| Nakamura 2007 ii*†‡ <sup>3</sup>  | 309          | R, DB, PC, MC | Japan          | 23       | 47                     | 34      | 38         | 29      | 40               | 27      | 33         | 23      |
| Nakamura 2007 i*†‡ <sup>3</sup>   | 307          | R, DB, PC, MC | Japan          | 24       | 48                     | 34      | 39         | 29      | 43               | 27      | 31         | 23      |
| Tsai 2007 <sup>4</sup>            | 250          | R, DB, PC, MC | Taiwan & Korea | 23       | 57                     | 29      | 47         | 22      | NR               | NR      | NR         | NR      |
| Nides 2006 i*§ <sup>5</sup>       | 249          | R, DB, PC, MC | USA            | 21       | NR                     | NR      | 10         | 7       | NR               | NR      | 8          | 5       |
| Nides 2006 ii*§ <sup>5</sup>      | 249          | R, DB, PC, MC | USA            | 21       | NR                     | NR      | 10         | 7       | NR               | NR      | 6          | 5       |
| Nides 2006 iii*§ <sup>5</sup>     | 248          | R, DB, PC, MC | USA            | 20       | NR                     | NR      | 21         | 7       | NR               | NR      | 15         | 5       |
| Oncken 2006 i*†¶ <sup>6</sup>     | 259          | R, DB, PC, MC | USA            | 21       | NR                     | NR      | NR         | NR      | 22               | 5       | 18         | 4       |
| Oncken 2006 ii*†¶ <sup>6</sup>    | 259          | R, DB, PC, MC | USA            | 21       | NR                     | NR      | NR         | NR      | 35               | 5       | 25         | 4       |
| Oncken 2006 iii*†¶ <sup>6</sup>   | 258          | R, DB, PC, MC | USA            | 21       | NR                     | NR      | NR         | NR      | 26               | 5       | 19         | 4       |
| Oncken 2006 iv*†¶ <sup>6</sup>    | 258          | R, DB, PC, MC | USA            | 21       | NR                     | NR      | NR         | NR      | 24               | 5       | 19         | 4       |

CPD = cigarettes per day, R = randomized, DB = double-blind, PC = placebo controlled, MC = multi-center, NR = not reported.

References appear on the next page.

\*Number of subjects included in the analysis.

†Patients in the RCT by Nakamura were randomized to 0.5 mg/day of varenicline (i), 1.0 mg/day of varenicline (ii), or 2.0 mg/day of varenicline (iii), or placebo. Data from the same placebo arm were used for all comparisons.

‡Results obtained in part through correspondence.

§Patients in the RCT by Nides were randomized to 0.3 mg (i), 1 mg (ii), or 2 mg (iii) of varenicline, or placebo. Data from the same placebo arm were used for all comparisons.

¶Patients in the RCT by Oncken were randomized to titrated 1 mg/day (i), titrated 2 mg/day (ii), non-titrated 1 mg/day (iii), and non-titrated 2 mg/day (iv). Data from the same placebo arm were used for all comparisons.

#### References to Appendix 4 (page 2 of 2)

1. Gonzales D, Rennard SI, Nides M, et al. Varenicline, an alpha4beta2 nicotinic acetylcholine receptor partial agonist, vs sustained-release bupropion and placebo for smoking cessation: a randomized controlled trial. *JAMA* 2006;296:47-55.
2. Jorenby DE, Hays JT, Rigotti NA, et al. Efficacy of varenicline, an alpha4beta2 nicotinic acetylcholine receptor partial agonist, vs placebo or sustained-release bupropion for smoking cessation: a randomized controlled trial. *JAMA* 2006;296:56-63.
3. Nakamura M, Oshima A, Fujimoto Y, et al. Efficacy and tolerability of varenicline, an alpha4beta2 nicotinic acetylcholine receptor partial agonist, in a 12-week, randomized, placebo-controlled, dose-response study with 40-week follow-up for smoking cessation in Japanese smokers. *Clin Ther* 2007;29:1040-56.
4. Tsai ST, Cho HJ, Cheng HS, et al. A randomized, placebo-controlled trial of varenicline, a selective alpha4beta2 nicotinic acetylcholine receptor partial agonist, as a new therapy for smoking cessation in Asian smokers. *Clin Ther* 2007;29:1027-39.
5. Nides M, Oncken C, Gonzales D, et al. Smoking cessation with varenicline, a selective alpha4beta2 nicotinic receptor partial agonist: results from a 7-week, randomized, placebo- and bupropion-controlled trial with 1-year follow-up. *Arch Intern Med* 2006;166:1561-8.
6. Oncken C, Gonzales D, Nides M, et al. Efficacy and safety of the novel selective nicotinic acetylcholine receptor partial agonist, varenicline, for smoking cessation. *Arch Intern Med* 2006;166:1571-7.
