# Supplementary material
Source: PubMed Central journal article supplement (PMC2443223)
Supplement: supp_179_2_135_v2_5.pdf [file supp_179_2_135_v2_5.pdf]

Appendix 5: Trials investigating nicotine inhaler, nicotine nasal spray, and nicotine tablet (page 1 of 2)

| Study                            | Sample size | Design        | Country       | Mean CPD | Smoking abstinence (%) |         |            |         |                  |         |            |         |  |
|----------------------------------|-------------|---------------|---------------|----------|------------------------|---------|------------|---------|------------------|---------|------------|---------|--|
|                                  |             |               |               |          | 6 Months               |         |            |         | 12 Months        |         |            |         |  |
|                                  |             |               |               |          | Point prevalence       |         | Continuous |         | Point prevalence |         | Continuous |         |  |
|                                  |             |               |               |          | Active                 | Control | Active     | Control | Active           | Control | Active     | Control |  |
| <b>Nicotine Inhaler</b>          |             |               |               |          |                        |         |            |         |                  |         |            |         |  |
| Tonnesen 1993 <sup>1</sup>       | 286         | R, DB, PC     | Denmark       | 20       | NR                     | NR      | 17         | 8       | NR               | NR      | 15         | 5       |  |
| Hjalmarson 1997 <sup>2</sup>     | 247         | R, DB, PC     | Sweden        | 21       | NR                     | NR      | 35         | 19      | 31               | 19      | 28         | 18      |  |
| Schneider 1996 <sup>3</sup>      | 223         | R, DB, PC     | USA           | 28       | NR                     | NR      | 17         | 9       | NR               | NR      | 13         | 8       |  |
| Leischow 1996 <sup>4</sup>       | 222         | R, DB, PC     | USA           | 26       | NR                     | NR      | 20         | 6       | NR               | NR      | 11         | 5       |  |
| <b>Nicotine Nasal Spray</b>      |             |               |               |          |                        |         |            |         |                  |         |            |         |  |
| Schneider 1995 <sup>5</sup>      | 255         | R, DB, PC     | USA           | 29       | NR                     | NR      | 25         | 10      | NR               | NR      | 18         | 8       |  |
| Hjalmarson 1994 <sup>6</sup>     | 248         | R, DB, PC     | Sweden        | 21       | NR                     | NR      | 35         | 15      | NR               | NR      | 27         | 15      |  |
| Sutherland 1992 <sup>7</sup>     | 227         | R, DB, PC     | England       | 26       | NR                     | NR      | 32         | 12      | NR               | NR      | 26         | 10      |  |
| Blondal 1997 <sup>8</sup>        | 157         | R, DB, PC     | Iceland       | 25       | NR                     | NR      | 29         | 18      | NR               | NR      | 25         | 17      |  |
| <b>Nicotine Tablet</b>           |             |               |               |          |                        |         |            |         |                  |         |            |         |  |
| Shiffman 2002 i <sup>*9</sup>    | 458         | R, DB, PC, MC | England & USA | 17       | NR                     | NR      | 24         | 14      | NR               | NR      | 18         | 10      |  |
| Shiffman 2002 ii <sup>*9</sup>   | 451         | R, DB, PC, MC | England & USA | 27       | NR                     | NR      | 24         | 10      | NR               | NR      | 15         | 6       |  |
| Glover 2002 ij <sup>*10</sup>    | 158         | R, DB, PC     | USA           | 29       | NR                     | NR      | NR         | NR      | NR               | NR      | 19         | 9       |  |
| Wallström 2000 I <sup>*11</sup>  | 105         | R, DB, PC     | Sweden        | 20       | NR                     | NR      | 34         | 20      | NR               | NR      | 29         | 20      |  |
| Wallström 2000 ii <sup>*11</sup> | 142         | R, DB, PC     | Sweden        | 20       | NR                     | NR      | 33         | 17      | NR               | NR      | 16         | 13      |  |
| Glover 2002 i <sup>*10</sup>     | 83          | R, DB, PC     | USA           | 29       | NR                     | NR      | 21         | 13      | NR               | NR      | 17         | 12      |  |

CPD = cigarettes per day, R = randomized, DB = double-blind, PC = placebo controlled, MC = multi-center, NR = not reported.

References appear on the next page.

\*The RCTs by Shiffman, Glover, and Wallstrom stratified randomization based on level of nicotine dependence; nicotine table was thus compared with placebo in patients with low (ii) and high (i) nicotine dependence, where nicotine dependence was defined by number of CPD.

## References to Appendix 5 (page 2 of 2)

1. Tonnesen P, Norregaard J, Mikkelsen K, et al. A double-blind trial of a nicotine inhaler for smoking cessation. *JAMA* 1993;269:1268-71.
2. Hjalmarson A, Nilsson F, Sjoström L, et al. The nicotine inhaler in smoking cessation. *Arch Intern Med* 1997;157:1721-8.
3. Schneider NG, Olmstead R, Nilsson F, et al. Efficacy of a nicotine inhaler in smoking cessation: a double-blind, placebo-controlled trial. *Addiction* 1996;91:1293-306.
4. Leischow SJ, Nilsson F, Franzon M, et al. Efficacy of the nicotine inhaler as an adjunct to smoking cessation. *Am J Health Behav* 1996;20:364-71.
5. Schneider NG, Olmstead R, Mody FV, et al. Efficacy of a nicotine nasal spray in smoking cessation: a placebo-controlled, double-blind trial. *Addiction* 1995;90:1671-82.
6. Hjalmarson A, Franzon M, Westin A, et al. Effect of nicotine nasal spray on smoking cessation. A randomized, placebo-controlled, double-blind study. *Arch Intern Med* 1994;154:2567-72.
7. Sutherland G, Stapleton JA, Russell MA, et al. Randomised controlled trial of nasal nicotine spray in smoking cessation. *Lancet* 1992;340:324-9.
8. Blöndal T, Franzon M, Westin A. A double-blind randomized trial of nicotine nasal spray as an aid in smoking cessation. *Eur Respir J* 1997;10:1585-90.
9. Shiffman S, Dresler CM, Hajek P, et al. Efficacy of a nicotine lozenge for smoking cessation. *Arch Intern Med* 2002;162:1267-76.
10. Glover ED, Glover PN, Franzon M, et al. A comparison of a nicotine sublingual tablet and placebo for smoking cessation. *Nicotine Tob Res* 2002;4:441-50.
11. Wallström M, Nilsson F, Hirsch JM. A randomized, double-blind, placebo-controlled clinical evaluation of a nicotine sublingual tablet in smoking cessation. *Addiction* 2000;95:1161-71.
