# Supplementary material
Source: PubMed Central journal article supplement (PMC2443223)
Supplement: supp_179_2_135_v2_7.pdf [file supp_179_2_135_v2_7.pdf]

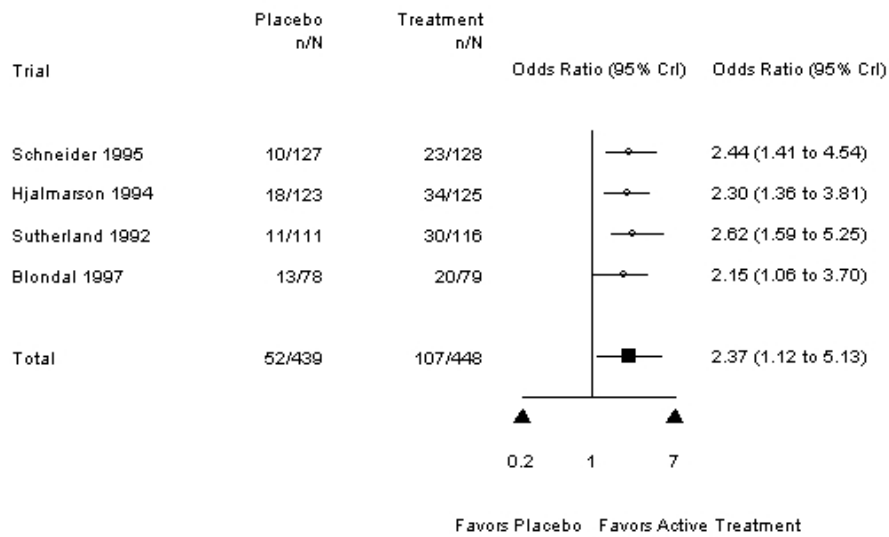

**Appendix 7** (as supplied by the authors): Effect of nicotine nasal spray on smoking cessation. Smoking cessation is defined by the most rigorous criterion of abstinence (the most conservative outcome reported in any given trial), based on the following ranking: continuous abstinence at 12 months; continuous abstinence at 6 months; point prevalence of abstinence at 12 months; point prevalence of abstinence at 6 months. Trials are ordered according to the number of patients analyzed using the most rigorous criteria. Details of the individual trials are summarized in Appendix 5 (available at [www.cmaj.ca/cgi/content/full/179/2/135/DC2](http://www.cmaj.ca/cgi/content/full/179/2/135/DC2)).
